# Supplementary material for: Interactions between Rainbow Trout Eyed Eggs and Flavobacterium spp. Using a Bath Challenge Model: Preliminary Evaluation of Bacteriophages as Pathogen Control Agents
Source: MDPI journal article supplement (doi:10.3390/microorganisms9050971), 2021-04-30
Supplement: s1 [file s1]

# Supplementary Material: Interactions between Rainbow Trout Eyed Eggs and *Flavobacterium* spp. Using a Bath Challenge Model: Preliminary Evaluation of Bacteriophages as Pathogen Control Agents

Valentina L. Donati <sup>1,\*</sup>, Inger Dalsgaard <sup>1</sup>, Anniina Runtuvuori-Salmela <sup>2</sup>, Heidi Kunttu <sup>2</sup>, Johanna Jørgensen <sup>3</sup>, Daniel Castillo <sup>3,4</sup>, Lotta-Riina Sundberg <sup>2</sup>, Mathias Middelboe <sup>3</sup> and Lone Madsen <sup>1</sup>

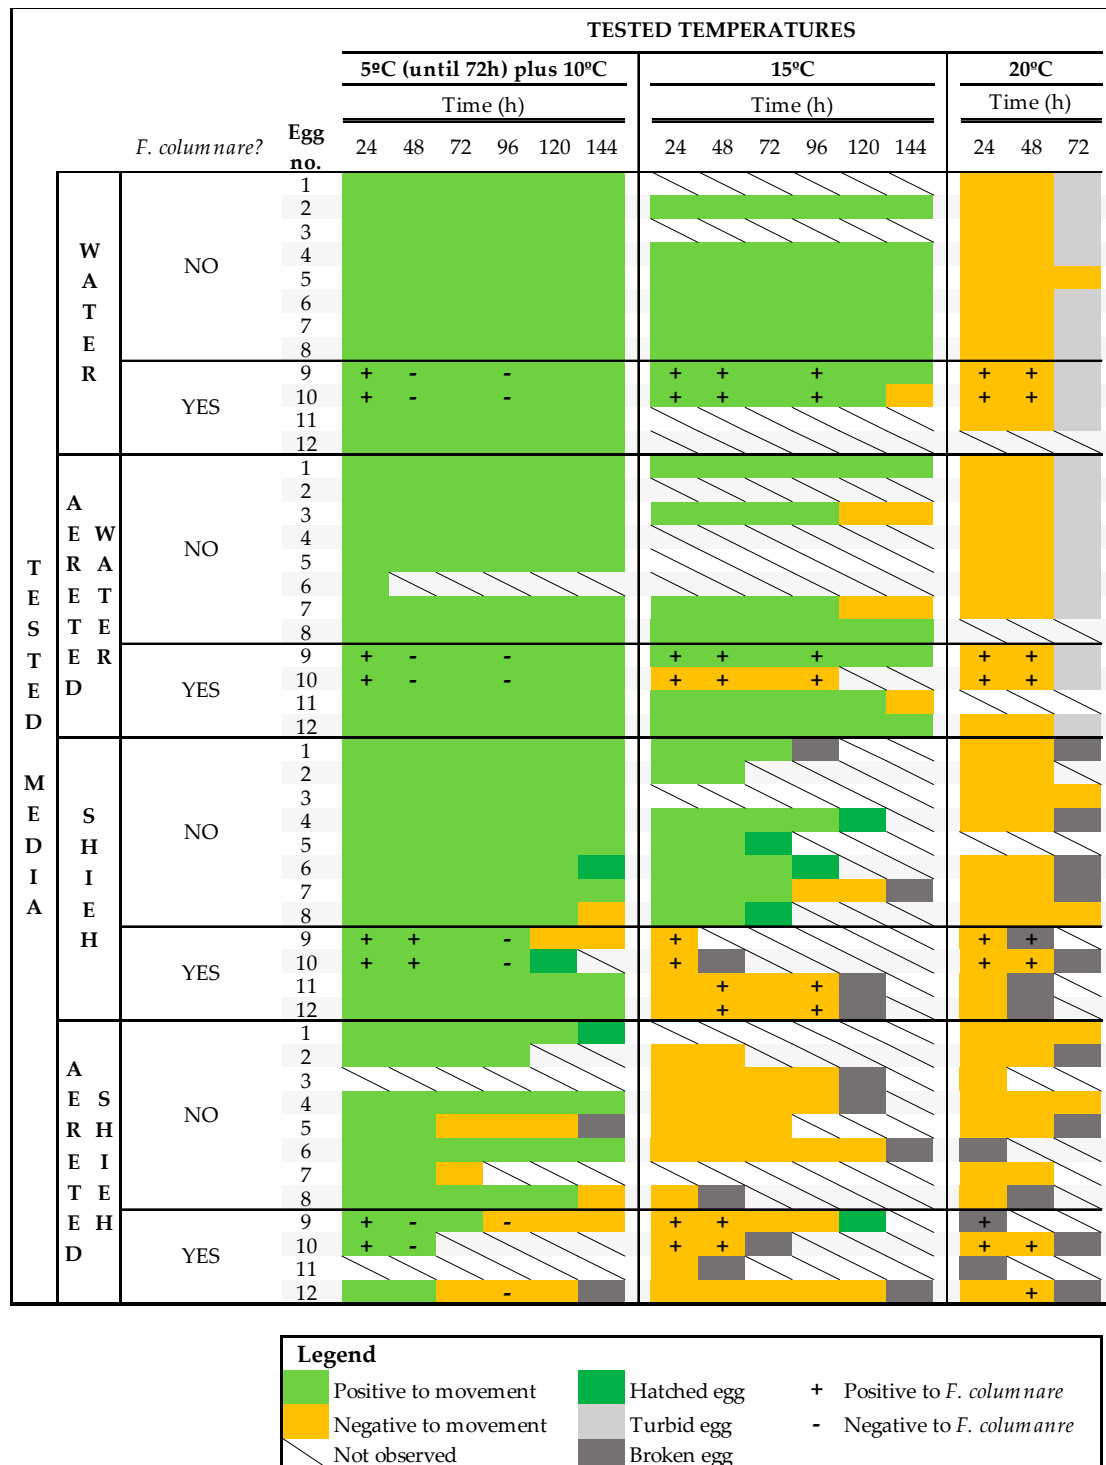

**Figure S1.** Survival of rainbow trout eggs at different temperatures with and without exposure to *F. columnare*, in either water or Shieh medium (Section A).

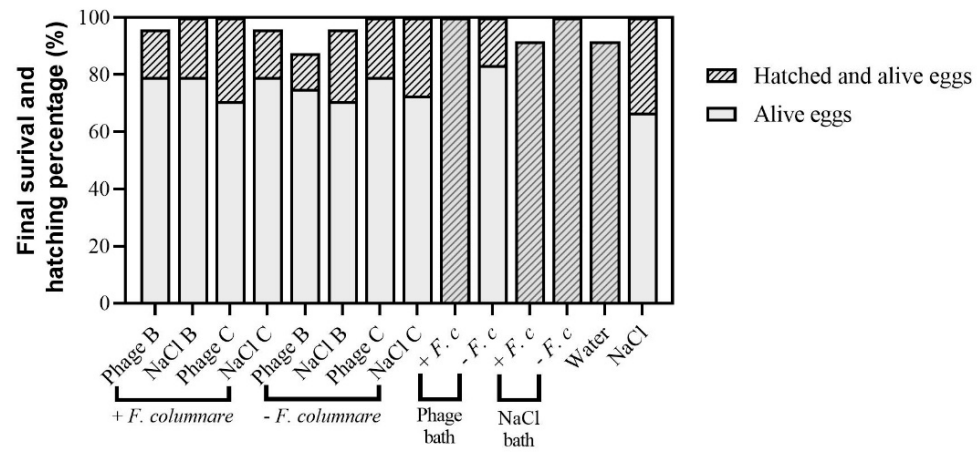

**Figure S2.** Exp. II, section C: survival and hatching percentage recorded at the end of the experiment (144 h). B: bath exposure, C: constant exposure, *F. c* = *F. columnare* B185.
